# Supplementary material for: Computational docking of FtsZ: Survey of promising antibiotic compounds
Source: PubMed Central journal article supplement — Biochem Biophys Rep. 2024 Aug 1;39:101796. doi: 10.1016/j.bbrep.2024.101796 (PMC11647940; doi:10.1016/j.bbrep.2024.101796), 2024-08-01
Supplement: mmc1.pdf [file mmc1.pdf]

# Computational Docking of FtsZ: Survey of Promising Antibiotic Compounds

Ileini N. Espino<sup>a</sup>, Julia Drolet<sup>a</sup>, Ty-niquia Jones<sup>a</sup>, Antonette Uwechue<sup>a</sup>,  
Brittany Koehler<sup>a</sup>, Raquel Beaird<sup>a</sup>, Sanni Maione<sup>a</sup>, Christine Darrah<sup>a</sup>,  
Rana Hijazi<sup>a</sup>, Christopher James<sup>a</sup>, Annabelle Dupre<sup>a</sup>, Ewa Koscinski<sup>a</sup>,  
Leilani Creft<sup>a</sup>, Michael Giampaolo<sup>a</sup>, Alexandre Bernier<sup>a</sup>, Kelly E. Theisen<sup>a</sup>

<sup>a</sup>*State University of New York at Plattsburgh, 101 Broad  
Street, Plattsburgh, 12901, NY, USA*

---

---

## 1. Z-Test Statistical Analysis

$$Z - Score = \frac{(\chi_1 - \chi_2) - (\mu_1 - \mu_2)}{\sqrt{\frac{(\sigma_1)^2}{n_1} + \frac{(\sigma_2)^2}{n_2}}}$$

$\chi$  = sample mean = average of the first few clusters (first 35 to 50 results)

$\mu$  = mean = average of the full data set (usually about 250 results)

$\sigma$  = stdev = standard deviation of the full data set

$n$  = population size = total number of results in the data set

The P-value is calculated as the normal distribution of the Z-score. All calculations done using Google Sheets formulas (AVERAGE, COUNT, STDEV, and NORM.S.DIST). Additional values from the calculations (or simulations) available by request to the corresponding author.

## 2. Free Docking Results

### 2.1. Controls

Ciligin-BP served as a negative control (not expected to bind to FtsZ). PC190723 served as a positive control.

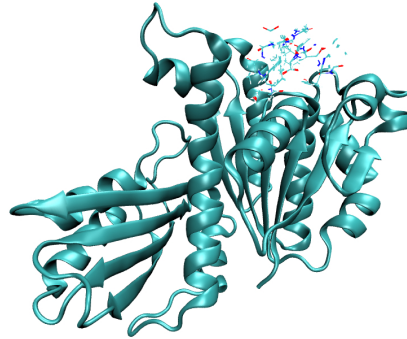

Figure 1: Free docking results of 3wgn protein with Ciligicin-BP ligand.

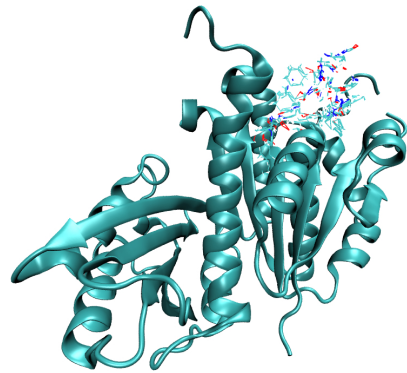

Figure 2: Free docking results of 6umk protein with Ciligicin-BP ligand.

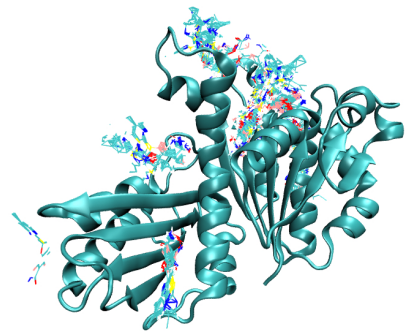

Figure 3: Free docking results of 3wgn protein with PC190723 ligand.

## 2.2. Additional FtsZ Structures Tested

These results were obtained too late to fully analyze for the main text, but similar Average  $\Delta G$  values were observed, along with similar binding sites.

Table 1: Additional FtsZ Species Investigated

| PDB Code | Drug Bound  | Bacterial Species    | Classification | Average $\Delta G$ (kcal/mol) |
|----------|-------------|----------------------|----------------|-------------------------------|
| 6unx     | Resveratrol | <i>E. coli</i>       | Gram-negative  | -6.41                         |
| 2vap     | Resveratrol | <i>M. jannaschii</i> | Gram-negative  | -6.01                         |
| 5xdw     | Plumbagin   | <i>S. aureus</i>     | Gram-positive  | -5.85                         |
| 2vaw     | TXY436      | <i>P. aeruginosa</i> | Gram-negative  | -7.33                         |

## 2.3. Experimental Compounds

All other compounds below have their binding energies reported in the main text.

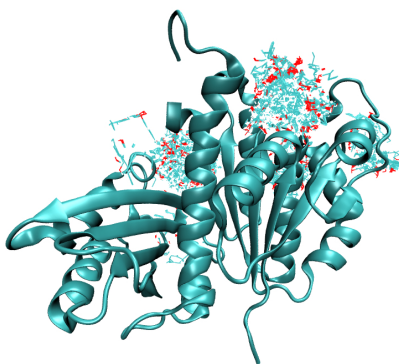

Figure 4: Free docking results of 6unx protein with Chrysopaentin ligand.

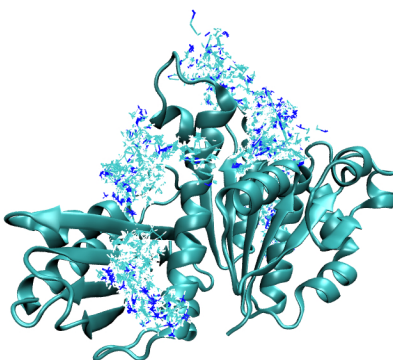

Figure 5: Free docking results of 3wgn protein with compound 12 ligand.

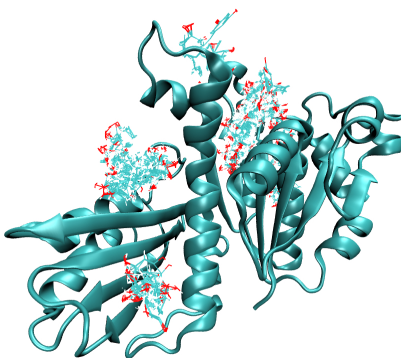

Figure 6: Free docking results of 3wgn protein with resveratrol ligand.

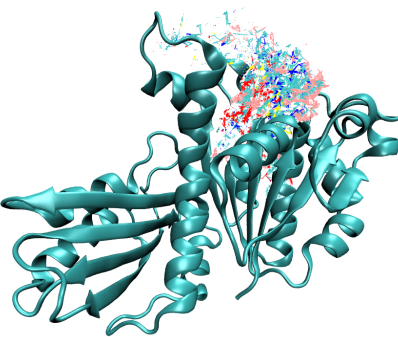

Figure 7: Free docking results of 3wgn protein with TXA709 ligand.

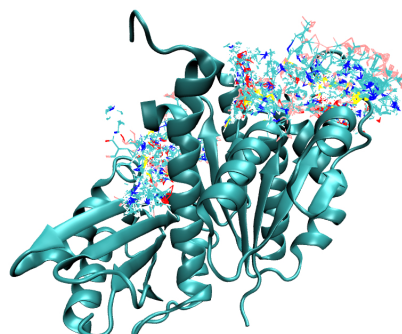

Figure 8: Free docking results of 6umk protein with TXA709 ligand.

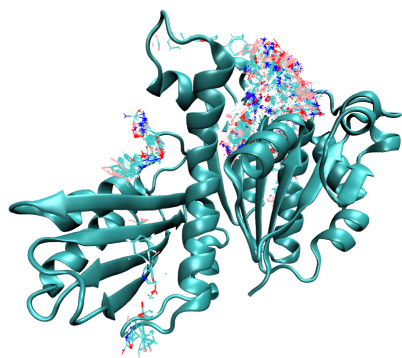

Figure 9: Free docking results of 3wgn protein with TXA6101 ligand.

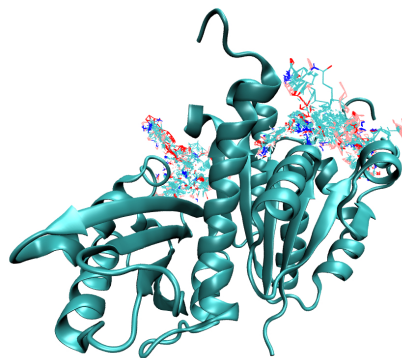

Figure 10: Free docking results of 6umk protein with TXA6101 ligand.

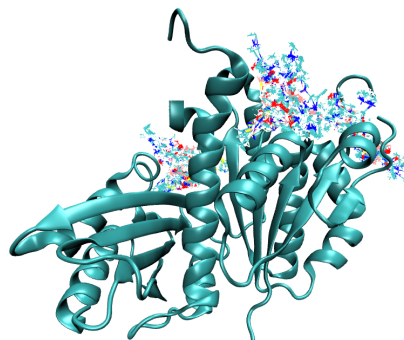

Figure 11: Free docking results of 6umk protein with TXY436 ligand.

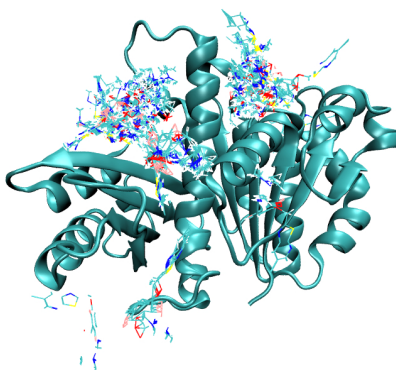

Figure 12: Free docking results of 2vam protein with TXY436 ligand.

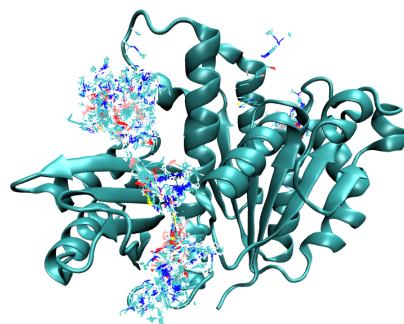

Figure 13: Free docking results of 2vxy protein with TXY436 ligand.

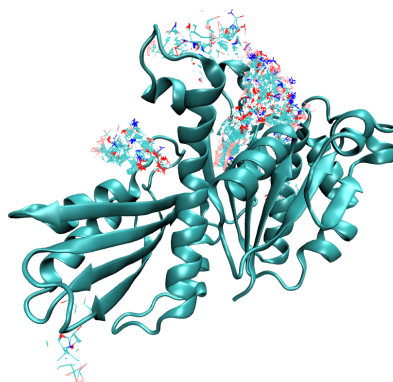

Figure 14: Free docking results of 3wgn protein with TXY6129 ligand.

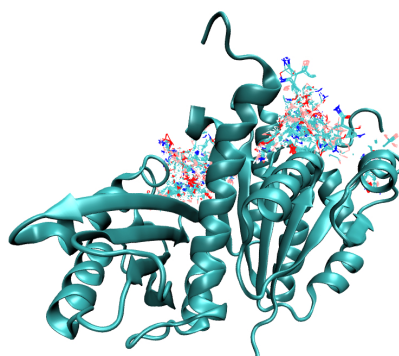

Figure 15: Free docking results of 6umk protein with TXY6129 ligand.

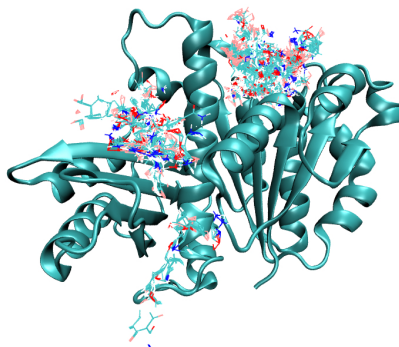

Figure 16: Free docking results of 2vam protein with compound 1 ligand.

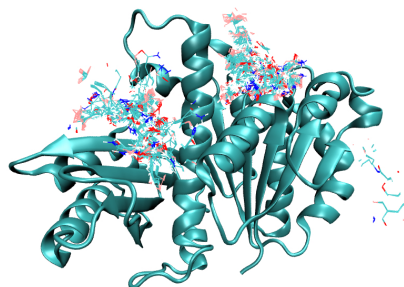

Figure 17: Free docking results of 2vam protein with compound 2 ligand.

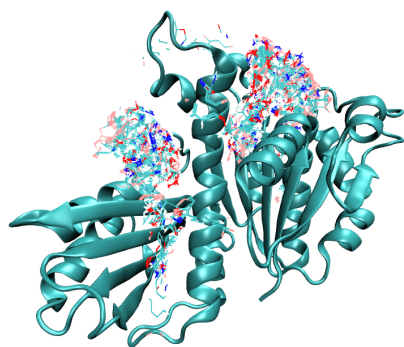

Figure 18: Free docking results of 3vo8 protein with compound 1 ligand.

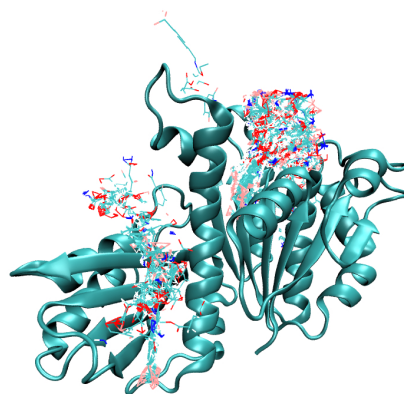

Figure 19: Free docking results of 3vo8 protein with compound 2 ligand.



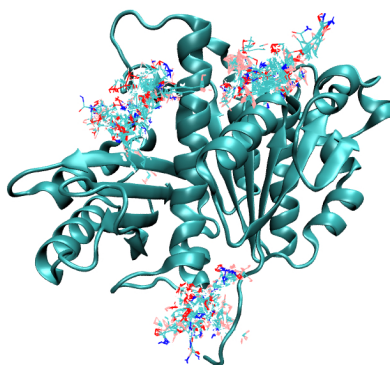

Figure 20: Free docking results of 5zue protein with compound 1 ligand.

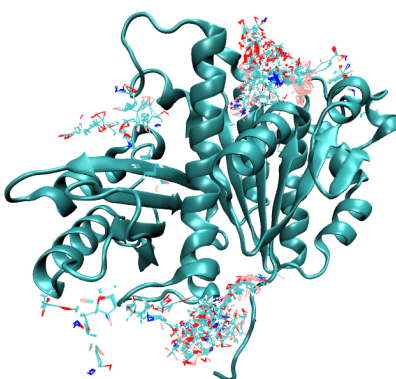

Figure 21: Free docking results of 5zue protein with compound 2 ligand.

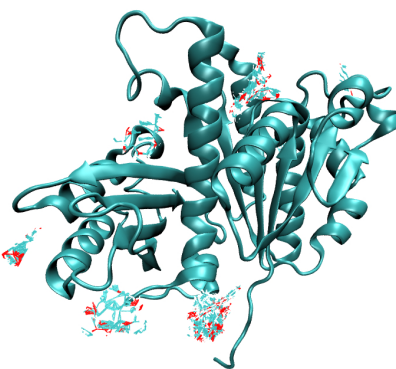

Figure 22: Free docking results of 5zue protein with plumbagin ligand.

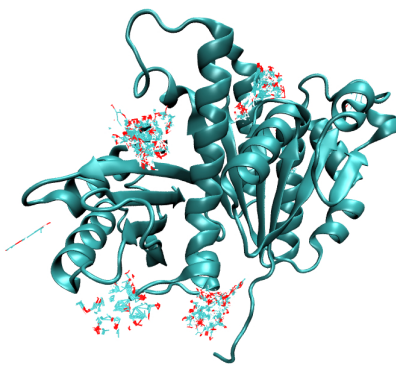

Figure 23: Free docking results of 5zue protein with scopoletin ligand.
